# Supplementary material for: Drp1 Overexpression Decreases Insulin Content in Pancreatic MIN6 Cells
Source: MDPI journal article supplement (doi:10.3390/ijms232012338), 2022-10-15

## Supplementary Data

### Drp1 Overexpression Decreases Insulin Content in Pancreatic MIN6 Cells

Uma D. Kabra <sup>1,2</sup>, Noah Moruzzi <sup>3</sup>, Per-Olof Berggren <sup>3</sup> and Martin Jastroch <sup>4,\*</sup>

**Supplementary Figure S1:** Less exposed immunoblot of OXPHOS complexes of Figure 2E.

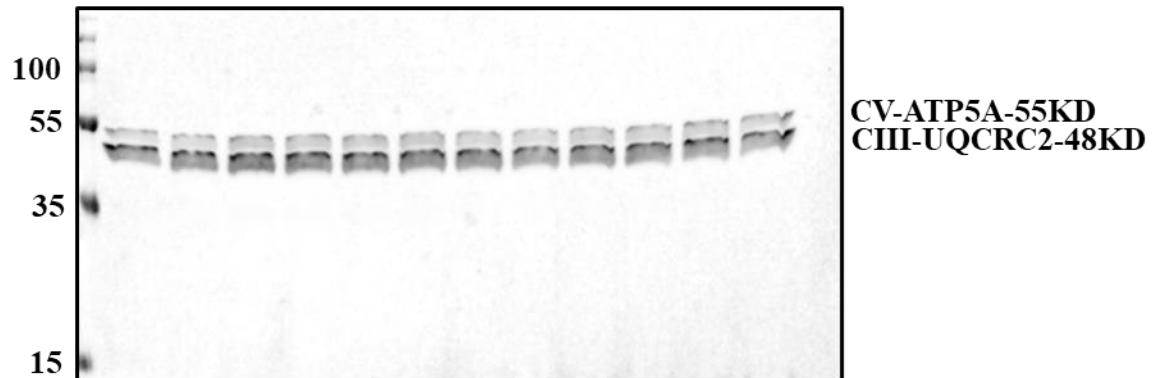

**Supplementary Figure S2:** Effect of an unrelated protein on insulin content. MIN6 cells were transiently transfected using p-ENTR\_RIP-GFP. A. Insulin content expressed at ng of DNA. Data are represented as mean  $\pm$ SEM (n=4) and n-values represent independent experiments. B. Representative microscopic image of GFP expression.

**A**

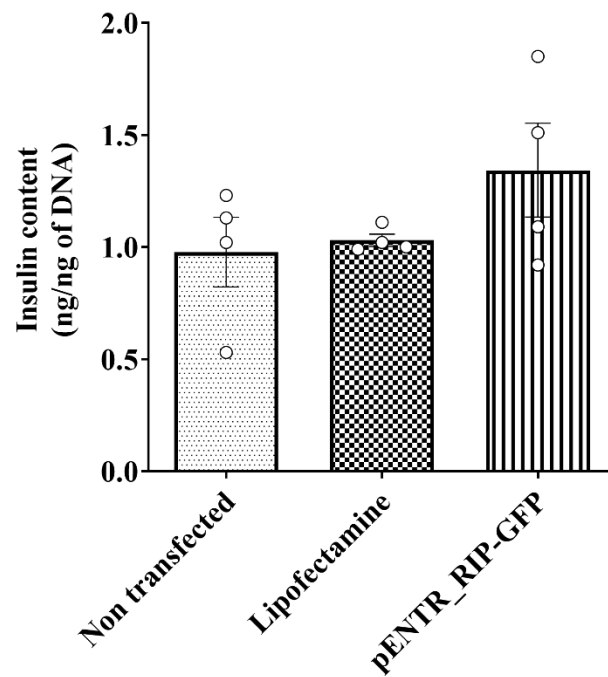

**B**

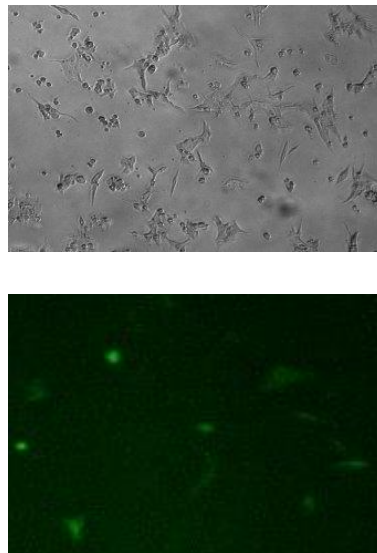

Supplement: s1 [file s1]
